# Supplementary material for: Using NextRAD sequencing to infer movement of herbivores among host plants
Source: PubMed Central journal article supplement (PMC5432177; doi:10.1371/journal.pone.0177742), 2017-05-15

**S1 Fig.** Workflow of NextRAD (Nextera-tagged reductively-amplified DNA) sequencing. A small amount of DNA (~10 ng) is mixed with two engineered transposomes of Nextera reagents which tag as well as add short adaptors to genomic DNA. Sequencing primers Read 1 and Read 2 (light green and light blue bars), indices (orange and brown bars) and a customized selective primer (red bar: GTGTAGAGC) are added by a limited cycle of PCR to generate sequencing-ready fragments, which are compatible for Illumina platforms.

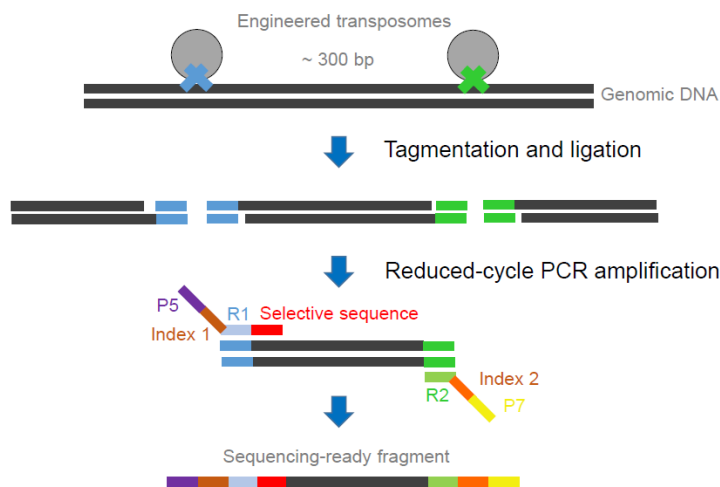

Supplement: pone.0177742.s001.pdf [file pone.0177742.s001.pdf]
