# Supplementary material for: Using NextRAD sequencing to infer movement of herbivores among host plants
Source: PubMed Central journal article supplement (PMC5432177; doi:10.1371/journal.pone.0177742), 2017-05-15

**S2 Fig.** Cross-validation (CV) error and standard error of ADMIXTURE runs of  $K$  ranging from 1 to 20. The lowest CV error was  $K = 9$ .

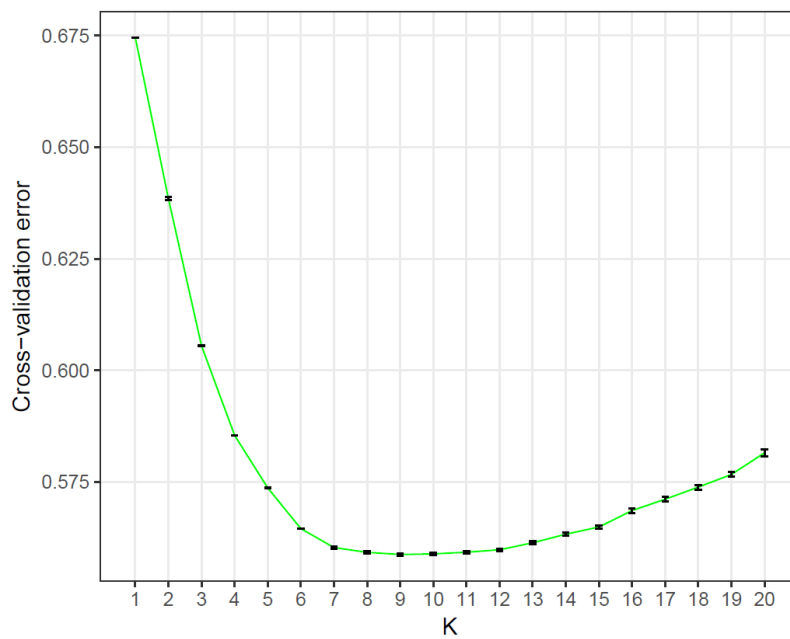

Supplement: pone.0177742.s002.pdf [file pone.0177742.s002.pdf]
