# Supplementary material for: Using NextRAD sequencing to infer movement of herbivores among host plants
Source: PubMed Central journal article supplement (PMC5432177; doi:10.1371/journal.pone.0177742), 2017-05-15

**S4 Fig.** Inbreeding coefficient,  $F_{IS}$  of psyllid populations collected from bittersweet nightshade patches (Nightshade) or from potato fields (Potato).

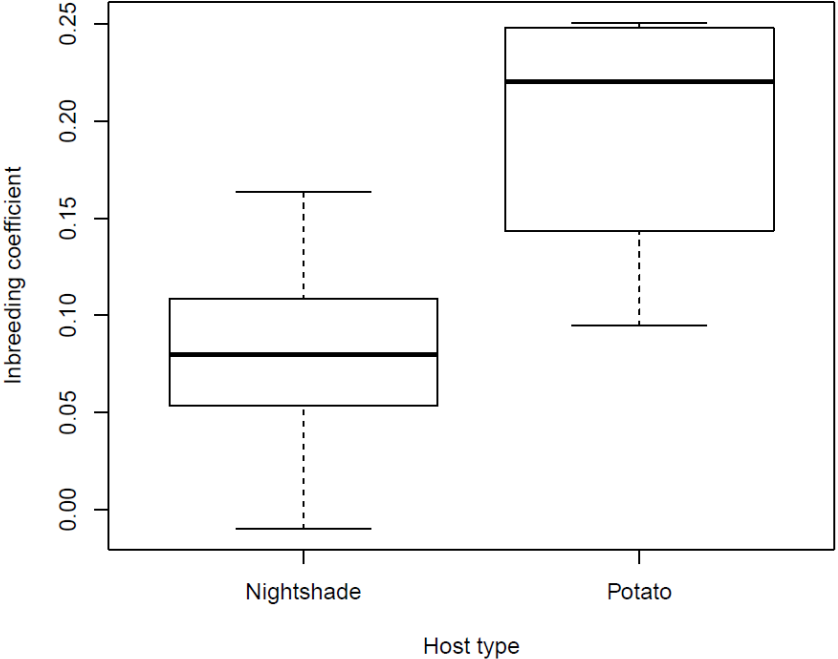

Supplement: pone.0177742.s004.pdf [file pone.0177742.s004.pdf]
