# Supplementary material for: Using NextRAD sequencing to infer movement of herbivores among host plants
Source: PubMed Central journal article supplement (PMC5432177; doi:10.1371/journal.pone.0177742), 2017-05-15

**S5 Fig.** Pairwise  $F_{ST}$  of psyllid populations separated on potato (Othello only) and nightshades shown in a heatmap. Sample name abbreviations from nightshades: CL=Caliche Lake, ML=Moses Lake, ME=Mesa, CX=Colfax, TF= Twin Falls, PA=Pasco, detailed sampling information were shown in Table 1 and S1 Table.

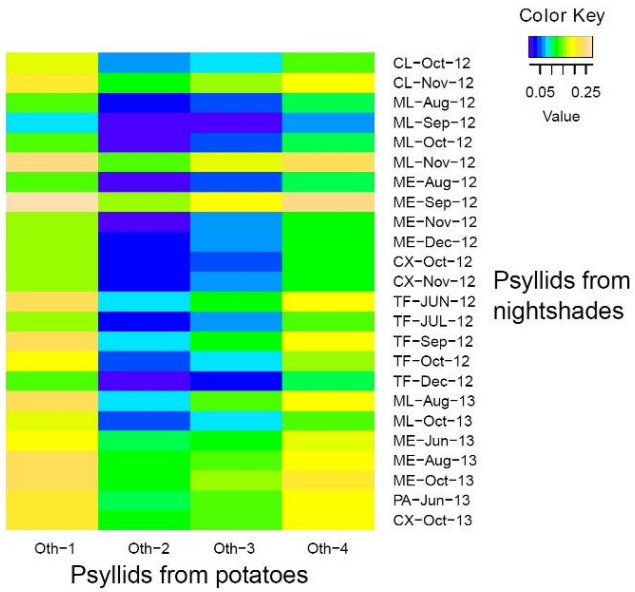

Supplement: pone.0177742.s005.pdf [file pone.0177742.s005.pdf]
