# Supplementary material for: Using NextRAD sequencing to infer movement of herbivores among host plants
Source: PubMed Central journal article supplement (PMC5432177; doi:10.1371/journal.pone.0177742), 2017-05-15
Supplement: pone.0177742.s006.pdf [file pone.0177742.s006.pdf]

**S1 Table.** Number of psyllids sampled from each sampling site at each date, for nightshade patches and potato fields in Washington and Idaho. Collections with sample size  $\geq 4$  were included in the  $F$ -statistics estimation (shaded in gray).

|                    | 2012 |     |     |     |     |     | 2013 |     |     |     |     |     |
|--------------------|------|-----|-----|-----|-----|-----|------|-----|-----|-----|-----|-----|
|                    | Jun  | Jul | Aug | Sep | Oct | Nov | Dec  | Jun | Jul | Aug | Sep | Oct |
| <b>Nightshades</b> |      |     |     |     |     |     |      |     |     |     |     |     |
| Caliche Lake (WA)  |      |     |     |     | 9   | 9   |      |     |     |     |     |     |
| Colfax (WA)        |      |     |     |     | 10* | 10  |      |     |     | 1   |     | 10  |
| Mesa (WA)          |      |     | 10  | 10  |     | 10  | 10   | 10  |     | 6   |     | 10  |
| Moses Lake (WA)    |      |     | 10  | 10  | 10  | 10  |      |     |     | 10  |     | 10  |
| Twin Falls (ID)    | 10*  | 10  |     | 10  | 10  |     | 10   |     |     |     |     |     |
| Pasco (WA)         |      |     |     |     |     |     |      | 10  |     |     |     |     |
| <b>Potatoes</b>    |      |     |     |     |     |     |      |     |     |     |     |     |
| ML-1               |      |     |     |     |     |     |      |     | 5   |     |     |     |
| ML-2               |      |     |     |     |     |     |      |     | 1   |     |     |     |
| ML-3               |      |     |     |     |     |     |      |     |     | 1   |     |     |
| Othello-1          |      |     |     |     |     |     |      |     | 1   | 10* |     |     |
| Othello-2          |      |     |     |     |     |     |      | 1   |     | 9*  |     |     |
| Othello-3          |      |     |     |     |     |     |      |     |     | 6   |     |     |
| Othello-4          |      |     |     |     |     |     |      |     |     | 10  |     |     |
| Patterson-1        |      |     |     |     |     |     |      |     |     | 4   |     |     |
| Patterson-2        |      |     |     |     |     |     |      |     | 1   |     |     |     |
| Patterson-3        |      |     |     |     |     |     |      |     |     | 1   |     |     |

\* indicate a sample from that population was removed due to missing data
