# Supplementary material for: Using NextRAD sequencing to infer movement of herbivores among host plants
Source: PubMed Central journal article supplement (PMC5432177; doi:10.1371/journal.pone.0177742), 2017-05-15
Supplement: pone.0177742.s007.pdf [file pone.0177742.s007.pdf]

**S2 Table.** Number of SNPs in each filtering step

| From reads to SNPs                                 | Number of SNPs |
|----------------------------------------------------|----------------|
| SNPs in initial genotyping                         | 8443           |
| <sup>1</sup> Removal of loci with > 5% missingness | 2400           |
| <sup>2</sup> Minor allele frequency (MAF) < 0.05   | 0              |
| Removal of loci with Heterozygosity (Ho) > 0.5     | 923            |
| Random select one SNP per contig                   | 1978           |
| HWE filter (p-value < 0.001)                       | 0              |
| SNPs used in population genetic analyses           | 1978           |

<sup>1</sup> We also removed four samples which had > 10 % of the missingness

<sup>2</sup> This filtering has been applied in the SNP calling process
