# Supplementary material for: Using NextRAD sequencing to infer movement of herbivores among host plants
Source: PubMed Central journal article supplement (PMC5432177; doi:10.1371/journal.pone.0177742), 2017-05-15
Supplement: pone.0177742.s008.pdf [file pone.0177742.s008.pdf]

**S3 Table.** Pairwise population differentiation ( $F_{ST}$ ) estimates of potato psyllid from nightshades at the Mesa site at different sampling dates: June (J), August (A), September (S), October (O), November (N) and December (D) of 2012 (12) and 2013 (13). \* indicates  $p$ -value  $> 0.05$ , 500 bootstrapping was performed across loci.

|     | A12 | S12   | N12    | D12   | J13   | A13   | O13     |
|-----|-----|-------|--------|-------|-------|-------|---------|
| A12 | -   | 0.154 | 0.167  | 0.124 | 0.146 | 0.078 | 0.054   |
| S12 |     | -     | 0.002* | 0.185 | 0.019 | 0.034 | 0.049   |
| N12 |     |       | -      | 0.185 | 0.015 | 0.028 | 0.053   |
| D12 |     |       |        | -     | 0.154 | 0.096 | 0.063   |
| J13 |     |       |        |       | -     | 0.010 | 0.029   |
| A13 |     |       |        |       |       | -     | -0.011* |
| O13 |     |       |        |       |       |       | -       |
