# Supplementary material for: Using NextRAD sequencing to infer movement of herbivores among host plants
Source: PubMed Central journal article supplement (PMC5432177; doi:10.1371/journal.pone.0177742), 2017-05-15
Supplement: pone.0177742.s009.pdf [file pone.0177742.s009.pdf]

**S4 Table.** Pairwise population differentiation ( $F_{ST}$ ) estimates of psyllids from the Moses Lake nightshade site at different sampling dates: August (A), September (S), October (O), November (N) of 2012 (12) and 2013 (13). \* indicates  $p$ -value > 0.05, 500 bootstrapping was performed across loci.

|     | A12 | S12   | O12   | N12    | A13   | O13   |
|-----|-----|-------|-------|--------|-------|-------|
| A12 | -   | 0.018 | 0.005 | 0.001* | 0.113 | 0.083 |
| S12 |     | -     | 0.017 | 0.006  | 0.116 | 0.086 |
| O12 |     |       | -     | 0.004* | 0.088 | 0.053 |
| N12 |     |       |       | -      | 0.098 | 0.067 |
| A13 |     |       |       |        | -     | 0.022 |
| O13 |     |       |       |        |       | -     |
