# Supplementary material for: Using NextRAD sequencing to infer movement of herbivores among host plants
Source: PubMed Central journal article supplement (PMC5432177; doi:10.1371/journal.pone.0177742), 2017-05-15
Supplement: pone.0177742.s010.pdf [file pone.0177742.s010.pdf]

**S5 Table.** Pairwise population differentiation ( $F_{ST}$ ) estimates of potato psyllid from four potato fields at Othello in summer 2013. \* indicates  $p$ -value  $> 0.05$ , 500 bootstrapping was performed across loci.

|       | Oth-1 | Oth-2 | Oth-3 | Oth-4   |
|-------|-------|-------|-------|---------|
| Oth-1 | -     | 0.096 | 0.037 | -0.001* |
| Oth-2 |       | -     | 0.013 | 0.066   |
| Oth-3 |       |       | -     | 0.014   |
| Oth-4 |       |       |       | -       |
