# Supplementary material for: Using NextRAD sequencing to infer movement of herbivores among host plants
Source: PubMed Central journal article supplement (PMC5432177; doi:10.1371/journal.pone.0177742), 2017-05-15
Supplement: pone.0177742.s011.pdf [file pone.0177742.s011.pdf]

**S6 Table.** Median pairwise genetic distance (percent dissimilarity among individuals) and  $F_{ST}$  among groups of psyllids designated following ADMIXTURE  $K = 3$  (Fig 3). While  $K = 3$  in ADMIXTURE, there were four psyllids groups separated by hosts:

WA cluster 1 nightshade: psyllids in Washington from nightshades, shown as light blue bars in Fig 3 Panel A and B.

WA cluster 1 potato: psyllids in Washington from potatoes, shown as light blue bars in Fig 3 panel C.

WA cluster 3: psyllids collected from Othello (potato host) and one from Colfax (nightshade host), shown as purple bars in Fig 3 and labeled with red \*.

Idaho: psyllids collected from Idaho shown as orange bars in Fig 3.

| Groups                                 | Median percent dissimilarity | $F_{ST}$ |
|----------------------------------------|------------------------------|----------|
| WA cluster 1: potato vs. nightshade    | 29                           | 0.01     |
| WA: potato cluster 1 vs. cluster 3     | 36                           | 0.18     |
| WA: nightshade cluster 1 vs. cluster 3 | 38                           | 0.20     |
| WA cluster 1 potato vs. Idaho          | 31                           | 0.12     |
| WA cluster 1 nightshade vs. Idaho      | 32                           | 0.13     |
| WA cluster 3 vs. Idaho                 | 38                           | 0.28     |
